# Supplementary material for: Scalable biomimetic SARS-CoV‑2 nanovaccines with robust protective immune responses
Source: Signal Transduct Target Ther. 2022 Mar 25;7:96. doi: 10.1038/s41392-022-00942-y (PMC8949828; doi:10.1038/s41392-022-00942-y)
Supplement: Supplementary file 1 — Supporting Information [file 41392_2022_942_MOESM1_ESM.pdf]

# Supplementary Materials for

## Scalable Biomimetic SARS-CoV-2 Nanovaccines with Robust Protective Immune Responses

Xuenian Chen<sup>#1,3,4</sup>, Tongfei Shi<sup>#1,4</sup>, Chao Yang<sup>\*1,2,4</sup>, Fangman Chen<sup>1</sup>, Xuan He<sup>1,4</sup>,  
Kunbao Zhang<sup>1,4</sup>, Hanze Hu<sup>2</sup>, Lulu Cai<sup>5</sup>, Kam W. Leong<sup>\*2</sup> and Dan Shao<sup>\*1,3,4,6,7</sup>

<sup>1</sup> School of Biomedical Sciences and Engineering, South China University of  
Technology, Guangzhou International Campus, Guangzhou, Guangdong 511442,  
China

<sup>2</sup> Department of Biomedical Engineering, Columbia University, New York, NY 10027,  
USA

<sup>3</sup> Institutes of Life Sciences, School of Medicine, South China University of  
Technology, Guangzhou, Guangdong 510006, China

<sup>4</sup> National Engineering Research Center for Tissue Restoration and Reconstruction,  
South China University of Technology, Guangzhou, Guangdong 510006, China

<sup>5</sup> Personalized Drug Therapy Key Laboratory of Sichuan Province, Department of  
Pharmacy, Sichuan Provincial People's Hospital, School of Medicine, University of  
Electronic Science and Technology of China, No. 4, Section 2, Jianshe North Road,  
Chengdu, 610072, China

<sup>6</sup> Guangdong Provincial Key Laboratory of Biomedical Engineering, South China  
University of Technology, Guangzhou 510006, China

<sup>7</sup> Key Laboratory of Biomedical Material and Engineering of the Ministry of Education,  
South China University of Technology, Guangzhou 510006, China

# These authors contributed equally.

\* Correspondence: Chao Yang, Email: chaoyang@scut.edu.cn,

Kam W. Leong, Email: kamleong@columbia.edu,

Dan Shao, Email: shaodan@scut.edu.cn

### **This PDF file includes:**

Materials and Methods

Figures. S1 to S15

Tables S1 to S3

References

# 1    **Content**

|    |                                                                                     |    |
|----|-------------------------------------------------------------------------------------|----|
| 2  | I.    Materials and methods .....                                                   | 3  |
| 3  | 1.    Materials .....                                                               | 3  |
| 4  | 2.    Construction and transfection of the plasmids.....                            | 3  |
| 5  | 3.    Synthesis of biomimetic coronavirus nanovaccine.....                          | 4  |
| 6  | 4.    Characterization of biomimetic coronavirus nanovaccine.....                   | 5  |
| 7  | 5.    Cell culture.....                                                             | 5  |
| 8  | 6.    Cytotoxicity assay .....                                                      | 6  |
| 9  | 7.    In vitro uptake and activity .....                                            | 6  |
| 10 | 8.    Animal.....                                                                   | 7  |
| 11 | 9.    In vivo lymph node distribution.....                                          | 8  |
| 12 | 10.    Mouse vaccination experiments .....                                          | 8  |
| 13 | 11.    RBD-specific IgG antibody detection and neutralization test of pseudovirus   |    |
| 14 | 9                                                                                   |    |
| 15 | 12.    Statistical analysis .....                                                   | 10 |
| 16 | II.   Extended figures and tables .....                                             | 11 |
| 17 | Figure S1. Schematic illustration.....                                              | 11 |
| 18 | Figure S2. Construction and qualification of transfected plasmids. ....             | 12 |
| 19 | Figure S3. Plasmid transfection efficiency of HEK293T cells and cell membrane       |    |
| 20 | coating efficiency.....                                                             | 13 |
| 21 | Figure S4. Hydrodynamic characterization and stability of nanovaccines.....         | 14 |
| 22 | Figure S5. Stability, degradability and antigen quantification of nanovaccines..... | 15 |
| 23 | Figure S6. Biocompatibility of nanovaccines.....                                    | 16 |
| 24 | Figure S7. Quantification of CD40, CD80 and CD86 expression .....                   | 17 |
| 25 | Figure S8. Uptake of nanovaccines in APCs. ....                                     | 18 |
| 26 | Figure S9. APCs in the inguinal lymph node at 24 h after foot injection of          |    |
| 27 | nanovaccines.....                                                                   | 19 |
| 28 | Figure S10. ELISA absorbance vs. dilution curves. ....                              | 20 |
| 29 | Figure S11. Enhancement of the T-cell response by nanovaccines in vivo.....         | 21 |
| 30 | Figure S12. Representative T lymphocytes and APCs gating strategy. ....             | 22 |
| 31 | Figure S13. Flow cytometry analysis of portion of APCs, T lymphocytes and their     |    |
| 32 | subtypes.....                                                                       | 23 |
| 33 | Figure S14. Biological safety of nanovaccines in vivo.....                          | 24 |
| 34 | Figure S15. Histological safety of nanovaccines.....                                | 25 |
| 35 | Table S1. Comparison of our work with others typical reports.....                   | 26 |
| 36 | Table S2. Antibodies used for Flow Cytometer experiments of immune cells in the     |    |
| 37 | spleen of vaccinated mice. ....                                                     | 27 |
| 38 | Table S3. Antibodies used for Flow Cytometry experiments of uptake by APCs in       |    |
| 39 | the lymph nodes. ....                                                               | 28 |
| 40 | III.   References .....                                                             | 29 |
| 41 |                                                                                     |    |

## **I. Materials and methods**

### ***1. Materials***

Tetraethyl orthosilicate (TEOS), bis[3-(triethoxysilyl)propyl]tetrasulfide (BTESPT),  $\gamma$ -chloropropyl trimethoxysilane (CP), 3-aminopropyltriethoxysilane (APTES), ethyltrimethylammonium tosylate (CTAT), triethanolamine (TEAH<sub>3</sub>), triethanolamine (TEA), carboxyl-terminated 50:50 poly(lactic-co-glycolic) acid, succinic anhydride and silica dioxide microparticles with micron were purchased from Sigma-Aldrich Co. (St Louis, MO, USA). Vybrant DiD Cell-Labeling Solution (V22887) was purchased from Thermo Fisher Scientific. FITC labeled-CpG ODN 1826 was purchased from Sangon Biotech. Diselenide bridged MSN with applicable pore size, and surface charge were synthesized according to our previous reports [5]. TNF- $\alpha$ , IFN- $\gamma$  (mouse) ELISA Kit were bought from Elabscience (Wuhan, China). Antibodies used in the experiment of flow cytometry were obtained from Biolegend (California) or BD (USA) as shown in Table 2 and Table 3. SARS-CoV-2 Spike pseudovirus were bought from OBiO Technology (Shanghai) Corp. Ltd. SARS-CoV-2 Spike RBD Antibody in Western Blot was bought from R&D Systems (USA). Secondary antibody PE/Dazzle™ 594 Goat anti-mouse IgG Antibody for RBD quantification was bought from Biolegend (California). HEK293T-ACE2 cells, IL-4, and GM-CSF, were bought from Novoprotein (China).

### ***2. Construction and transfection of the plasmids***

The RBD expression sequence fragment was GPI anchor-linker-RBD, and the GFP-RBD expression sequence fragment was GPI anchor-linker-GFP-linker-RBD. The

1 RBD is a gene encoded the residues 319 – 541 aa of SARS-CoV-2 (YP\_009724390.1),  
2 and the GFP (GenBank: ABG78037.1) is 239 aa length, GPI length was 44 aa derived  
3 from GPIHBP1 (GenBank: AAH63857.1). Linker was chosen as Gly-Gly dipeptide.  
4 The two fragments were cloned into the pcDNA3.4 vector. HEK293T cells were  
5 transfected with plasmids independently by lipofectamine 3000 reagent.

6

### 7 ***3. Synthesis of biomimetic coronavirus nanovaccine***

8 The CpG loading was achieved with the MSN-to-CpG mass ratio of 5 to 1. The MSN-  
9 CpG was obtained after stirring at 4 °C overnight. Cell membrane extraction experiment  
10 was conducted as follows, after trypsinization, HEK293T cells were lysed and  
11 homogenized by sonication, then the cell pellets were collected by ultracentrifugation,  
12 finally suspended in DI water. The total membrane protein contents were quantified  
13 using the BCA protein assay kits.

14 FNC and bulk sonication producing-nanoparticles were synthesized as follows: all  
15 particles and cell membrane fragments were well dispersed in DI water, respectively.  
16 In the FNC method, particle solutions and cell membrane fragments were introduced  
17 into different inlets of the MIVM, respectively. The flow rate of 30 mL/min was applied  
18 to prepare membrane-coated particles with a mass ratio of 1/1. The efflux was collected  
19 for further use. For nanoparticles coated using the bulk sonication method, equal  
20 volumes of cell membrane vesicles and particle cores were mixed, pipetted, and  
21 sonicated. Nanoparticles of mixture formulation were prepared by mixing the CpG  
22 loaded MSN and cell membrane at the equal mass after dispersion.

1

#### 2 ***4. Characterization of biomimetic coronavirus nanovaccine***

3 The size, polydispersity index (PDI) and zeta potential of naked MSN, cell membrane,  
4 CpG loaded MSN, cell membrane-coated nanoparticles of FNC, bulk sonication and  
5 mixture formulation were measured using a Malvern Zetasizer. To assess the stability  
6 of CpG coated MSN, membrane-coated nanoparticles of FNC and bulk sonication  
7 formulation, particles were stored in the FBS containing DMEM medium and PBS for  
8 8 days and measured by DLS every day. For TEM characterization, samples were  
9 prepared and dried onto a carbon-coated copper grid. Identification of RBD protein  
10 expressed on the cell membrane or coated on the NPs was performed by Western  
11 blotting. To quantify the expression of RBD protein coated on the NPs, a range of  
12 concentrations of RBD protein and NPs was performed by Western Blot. To quantify  
13 the efficiency of plasmid transfection and NPs coating, two parallel fluorescence  
14 methods of RBD antibody-conjugated PE and GFP-RBD fusion protein were quantified  
15 by flow cytometry.

16

#### 17 ***5. Cell culture***

18 Human embryonic kidney cells, HEK 293T (CRL-3216), were cultured for cell  
19 membrane derivation. Cells were cultured in DMEM media with 10% fetal bovine  
20 serum (Gibco) and 100 U penicillin-streptomycin. The generation of bone-derived  
21 Dendritic cells (BMDCs) followed a previously published protocol. Healthy mice were  
22 euthanized using carbon dioxide asphyxiation followed by cervical dislocation. Both

1 femurs and tibias were dissected, cleaned in 75% ethanol, and cut on both ends. Bone  
2 marrow was then flushed out of the bone with a 1 mL sterile syringe using warm PBS.  
3 Cells were then pelleted at 700×g for 5 min, resuspended in a certain amount of red  
4 blood cell lysis buffer to reduce the red blood cell. Cells were then pelleted at 700×g  
5 for 5 min again, resuspended in BMDC growth media, consisting of the basal media  
6 further supplemented with 20 ng/mL granulocyte/macrophage-colony stimulating  
7 factor (GM-CSF) and 10 ng/mL interleukin-4 (IL-4), to a concentration of  $1 \times 10^6$   
8 cells/mL, and plated into Petri plates at  $10 \times 10^6$  cells per 100 mm plate. The medium  
9 was half-changed every two days.

10

## 11 **6. Cytotoxicity assay**

12 The cytotoxicity of naked MSN, cell membrane, CpG coated MSN, cell membrane-  
13 coated nanoparticles of bulk sonication, FNC and mixture formulation in the  
14 RAW264.7 cells or BMDCs was assessed using a CCK8 assay. The cells in the proper  
15 density were cultured in complete medium containing 5 or 20 µg/mL substances (CpG  
16 formulation) for 24 h, and then incubated with CCK8 solution for 1 hour. The cell  
17 activity was detected by reading the OD at 450 nm.

18

## 19 **7. In vitro uptake and activity**

20 For the cellular uptake study, BMDCs were collected on day 5 and then plated into 12-  
21 well plates. FITC-labeled CpG, DiD-labeled CM, MSN-CpG, CM-coated nanoparticles  
22 of FNC, bulk and mixture formulation were added at an equivalent CpG concentration

of 5 µg/mL. After 4 h incubation, the cells were washed and stained with DAPI. 15 min later, cells were imaged by fluorescence. For flow cytometry, cells were collected, washed twice in PBS, and resuspended in 300 µL PBS. The cell suspension was analyzed using BD FACSCelesta flow cytometer. The activity of the delivered CpG was examined using a BMDC maturation assay and cytokine release assay. BMDCs were collected on day 5, and  $5 \times 10^5$  BMDCs were plated into 6-well plates in BMDC growth media. Cells were pulsed with materials for 12 h at 5 µg/mL CpG, then washed twice with fresh media. After an additional 24 h of culture, cell supernatants were collected and cytokine content was analyzed using TNF-α ELISA kits. The cells were then collected, washed twice and stained with PE-conjugated CD11c, PerCP/Cy5.5-conjugated CD40, PE/Dazzele 594-conjugated CD80 and APC-conjugated CD86. Data were collected using a BD FACSCelesta flow cytometer. RAW264.7 cells were plated into 96-well suspension plates at  $2 \times 10^4$  cells/well and pulsed with materials for 24 h at 5 µg/mL CpG, then cell supernatants were collected and cytokine content was analyzed using TNF-α ELISA kits.

## **8. Animal**

All animals received care in compliance with the guidelines outlined in the Guide for the Care and Use of Laboratory Animals, and the procedures were approved by the South China University of Technology Animal Care and Use Committee. Female BALB/c mice were obtained at 5 weeks old from Hunan SJA Laboratory Animal Co., LTD.

1

## 2 ***9. In vivo lymph node distribution***

3 FITC-labeled MSN-CpG, mixture, CM-coated nanoparticles of FNC and bulk  
4 formulation were used for the antigen persistence at lymph nodes. At 12 h after injecting  
5 20  $\mu$ L of different NPs at foot pad, mice were euthanized and their inguinal lymph  
6 nodes were collected, stained with antibodies for dendritic cells and macrophages  
7 (panel shown in Table S2) for 30 min. Data were collected using BD FACSCelesta flow  
8 cytometer and analyzed using FlowJo software.

9

## 10 ***10. Mouse vaccination experiments***

11 Female 5-week-old BALB/c mice were randomly assigned to 5 cohorts of MSN-CpG,  
12 cell membrane, mixture, CM-coated nanoparticles of FNC and bulk formulation,  
13 vaccinated with about 500 ng of RBD subcutaneously and boosted on week 2,  
14 respectively. Mice of control group were injected with normal saline of equal volume.  
15 The weight of mice were monitored every week. On week 2, 4, 6, 8, 10 after prime  
16 vaccination, mice were sacrificed and blood was collected in the coagulation-promoting  
17 tubes. Plasma was separated by centrifugation and stored at -80 °C for further use. The  
18 levels of TNF- $\alpha$  and IFN- $\gamma$  in serum of vaccinated mice on week 4 were detected by  
19 ELISA kits.

20 To assess RBD-specific T cells, mice were sacrificed on the week 4 and  
21 splenocytes were collected. Single-cell suspensions of splenocytes were prepared by  
22 gently grinding. Splenocytes were stained for lymphocyte, macrophages, DCs, Tc cells,

1 Th cells and the subtypes (panel shown as Table S1) for 30 min. Then, stained cells  
2 were incubated with 10 µg/mL DiD-labeled MSN-CpG@CM (FNC) binding to the  
3 RBD-specific T cells. Data were collected using BD FACSCelesta flow cytometer and  
4 analyzed using FlowJo software.

5 To evaluate the safety of vaccines, the main tissues including livers, kidneys,  
6 spleens, lungs and hearts from the vaccinated mice on week 10 were collected, fixed in  
7 4% formalin and sectioned for hematoxylin and eosin (H&E) staining. The biochemical  
8 parameters including alanine aminotransferase (ALT), aspartate aminotransferase  
9 (AST), Urea, creatinine (CREA) and total protein (TP) were assayed.

10

#### 11 ***11. RBD-specific IgG antibody detection and neutralization test of pseudovirus***

12 Antibody titer detection adopted indirect ELISA method. In short, RBD protein (1  
13 µg/ml) was coated on the well plate and stored overnight at 4 °C. And then plate was  
14 washed three times. The serum of vaccinated mice on week 2, 4, 6, 8, 10 were serial  
15 diluted and added into the pre-coated well plate for incubation (37 °C, 1 h). And then  
16 the PBS was added to wash the well three times. Next, the enzyme labeled antibody  
17 was added and incubated for one hour. And then the PBS was added to wash the well  
18 three times. TMB solution was added to incubate for near 15 minutes in the dark.  
19 Finally, the stop solution was added, and the absorbance at 450 nm was measured with  
20 a microplate reader. The absorbance data was simulated in nonlinear fitting by Origin  
21 2021b software. The positive data was confirmed 2.1 times larger than the negative data.

1 In the pseudovirus neutralization test, 20  $\mu$ L of serum of vaccinated mice on week  
2 4 was first added and incubated with 20  $\mu$ L of SARS-CoV-2 Spike pseudovirus with  
3 GFP expressing the gene for 30 min and then the mixture was added to HEK293T-  
4 ACE2 cells to 200  $\mu$ L total culture medium. After 24 h of co-cultivation, the  
5 intracellular fluorescence content was measured by fluorescence to verify the protective  
6 effect of the serum RBD-specific antibody against pseudovirus.

## 7 ***12. Statistical analysis***

9 Statistical analysis was performed using GraphPad Prism 9 (GraphPad). Data were  
10 analyzed using one-way ANOVA with Tukey's post-hoc correction for multiple  
11 hypothesis testing unless otherwise stated. All flow cytometry data were analyzed using  
12 FlowJo\_v10.7.2 software (FlowJo LLC, BD Biosciences).

## II. Extended figures and tables

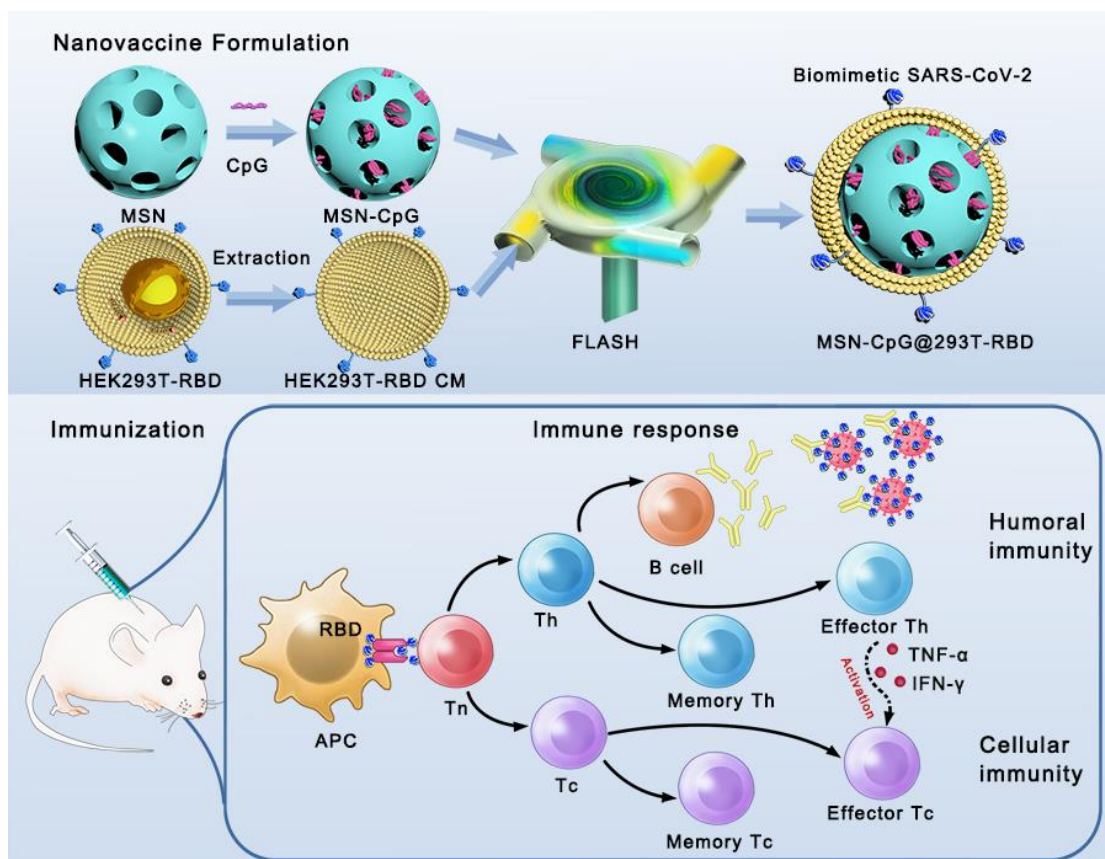

**Figure S1. Schematic illustration** of the synthesis procedure for the scalable engineered biomimetic SARS-CoV-2 nanovaccines and their effects on boosting humoral immunity and cellular immunity.

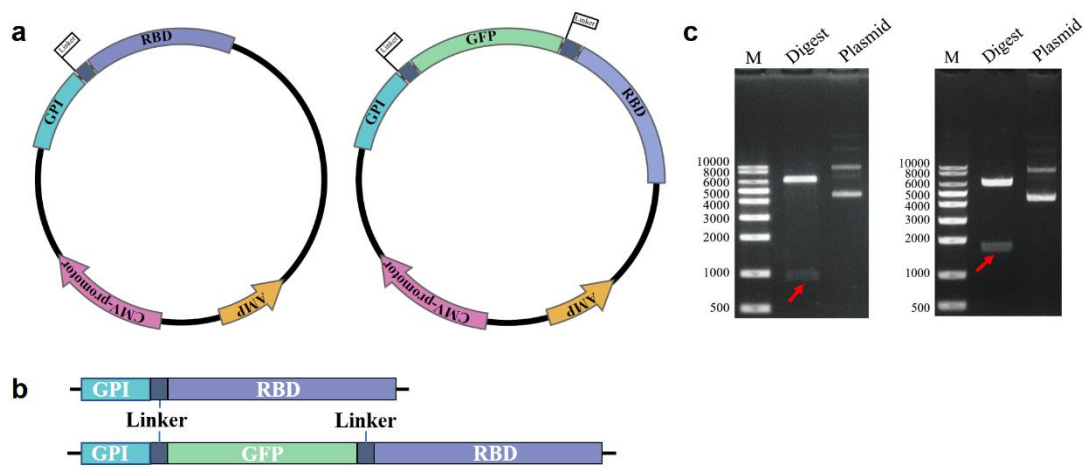

1 **Figure S2. Construction and qualification of the transfected plasmids.** a) Schematic  
 2 illustration of two constructed plasmids based on the pcDNA3.4 frame. pcDNA3.4-  
 3 RBD (left) and pcDNA3.4-GFP-RBD (right). b) The construction of two gene  
 4 fragments, the RBD fragment (above) and the GFP-RBD fragment (below). c)  
 5 Electrophoresis of two plasmids with double enzyme digestion, pcDNA3.4-RBD (left)  
 6 and pcDNA3.4-GFP-RBD (right).

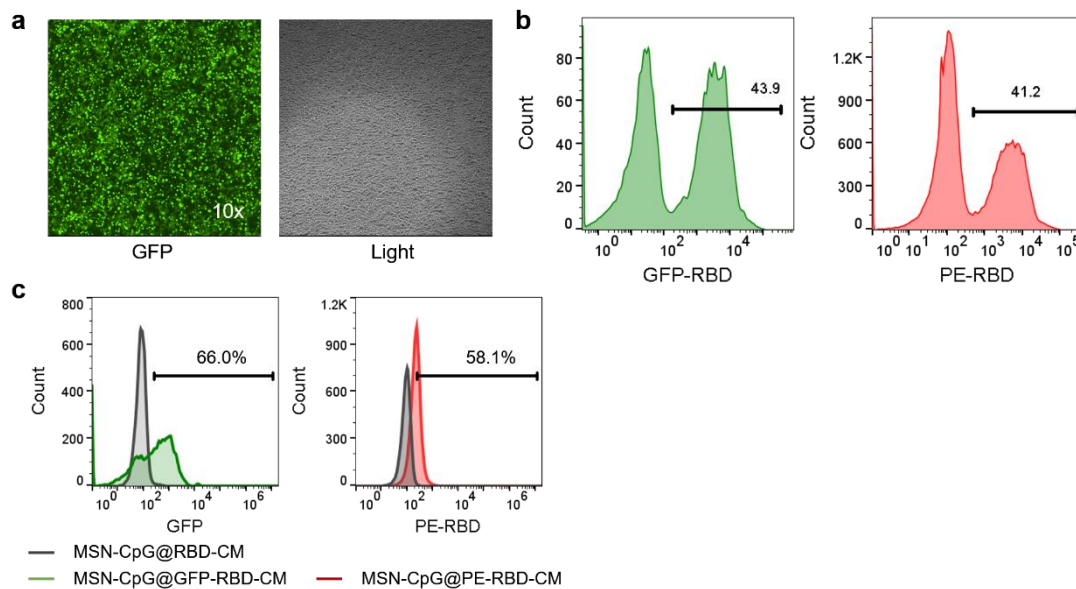

11 **Figure S3. Plasmid transfection efficiency of HEK293T cells and cell membrane**  
 12 **coating efficiency.** a) Fluorescence image of HEK293T cells transfected with GFP-  
 13 RBD fusion plasmid. b) Quantification of plasmid transfection efficiency via GFP-  
 14 RBD fusion (left) or PE-labeled RBD protein (right) on the cell surface by Flow  
 15 cytometry. c) Quantification of coating efficiency in FNC-produced nanoparticles via

1 GFP-RBD fusion (left) or PE-labeled RBD protein (right) on the cell membrane by  
2 Flow cytometry.

3

4

5

6

7

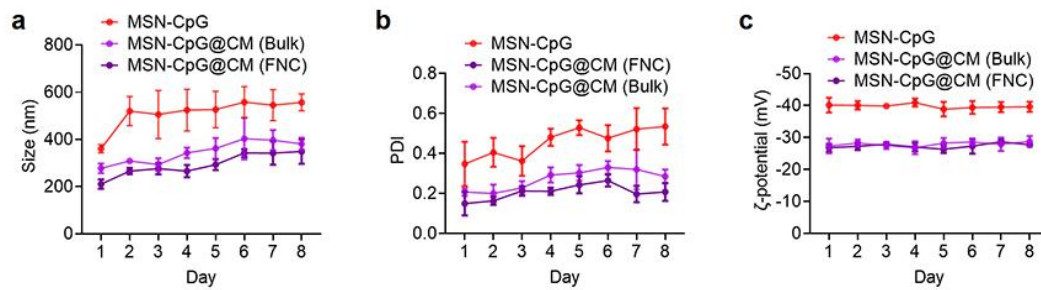

8

9 **Figure S4. Hydrodynamic characterization and stability of nanovaccines.** Time-  
10 dependent a) Size, b) PDI and c) Zeta-potential of bulk sonication and FNC formulation  
11 compared to MSN-CpG nanoparticles in PBS solution during 8 days. Data represent  
12 mean  $\pm$  SEM (n=3).

13

14

15

16

17

18

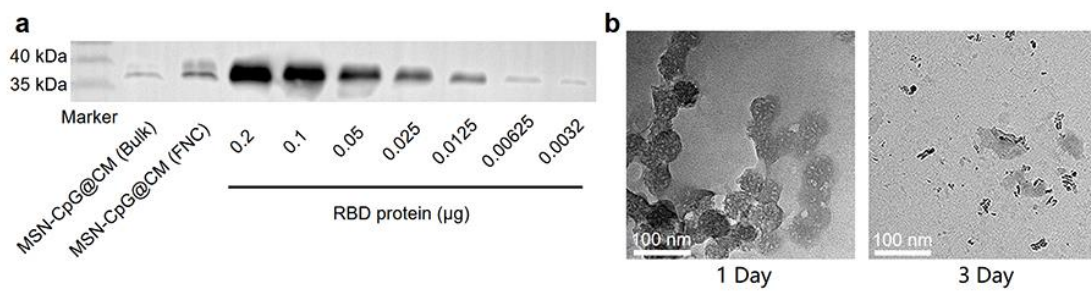

**Figure S5. Antigen quantification and degradability of nanovaccines.** a) Quantification of RBD protein on the surface of nanoparticles from bulk sonication and FNC formulation. b) TEM images of FNC nanoparticles after 1-day and 3-day incubation in simulated body fluid solution containing 100 μM H<sub>2</sub>O<sub>2</sub>.

1  
2  
3  
4  
5  
6

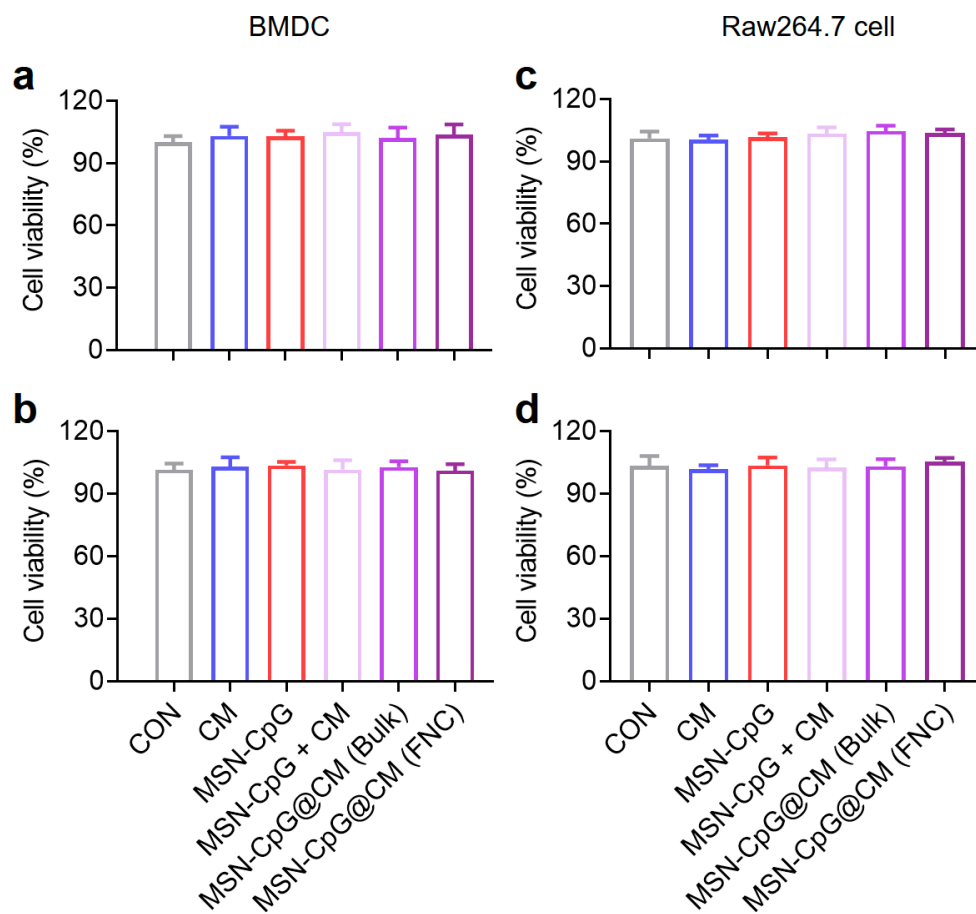

7

8 **Figure S6. Biocompatibility of nanovaccines.** The viability of a and b) BMDCs and  
9 c and d) RAW264.7 after treatment with different nanoparticles (5  $\mu$ g/mL (above) or  
10 20  $\mu$ g/mL (below) CpG formulation) for 24 h. Data represent mean  $\pm$  SEM (n=3).

11

1

2

3

4

5

6

7

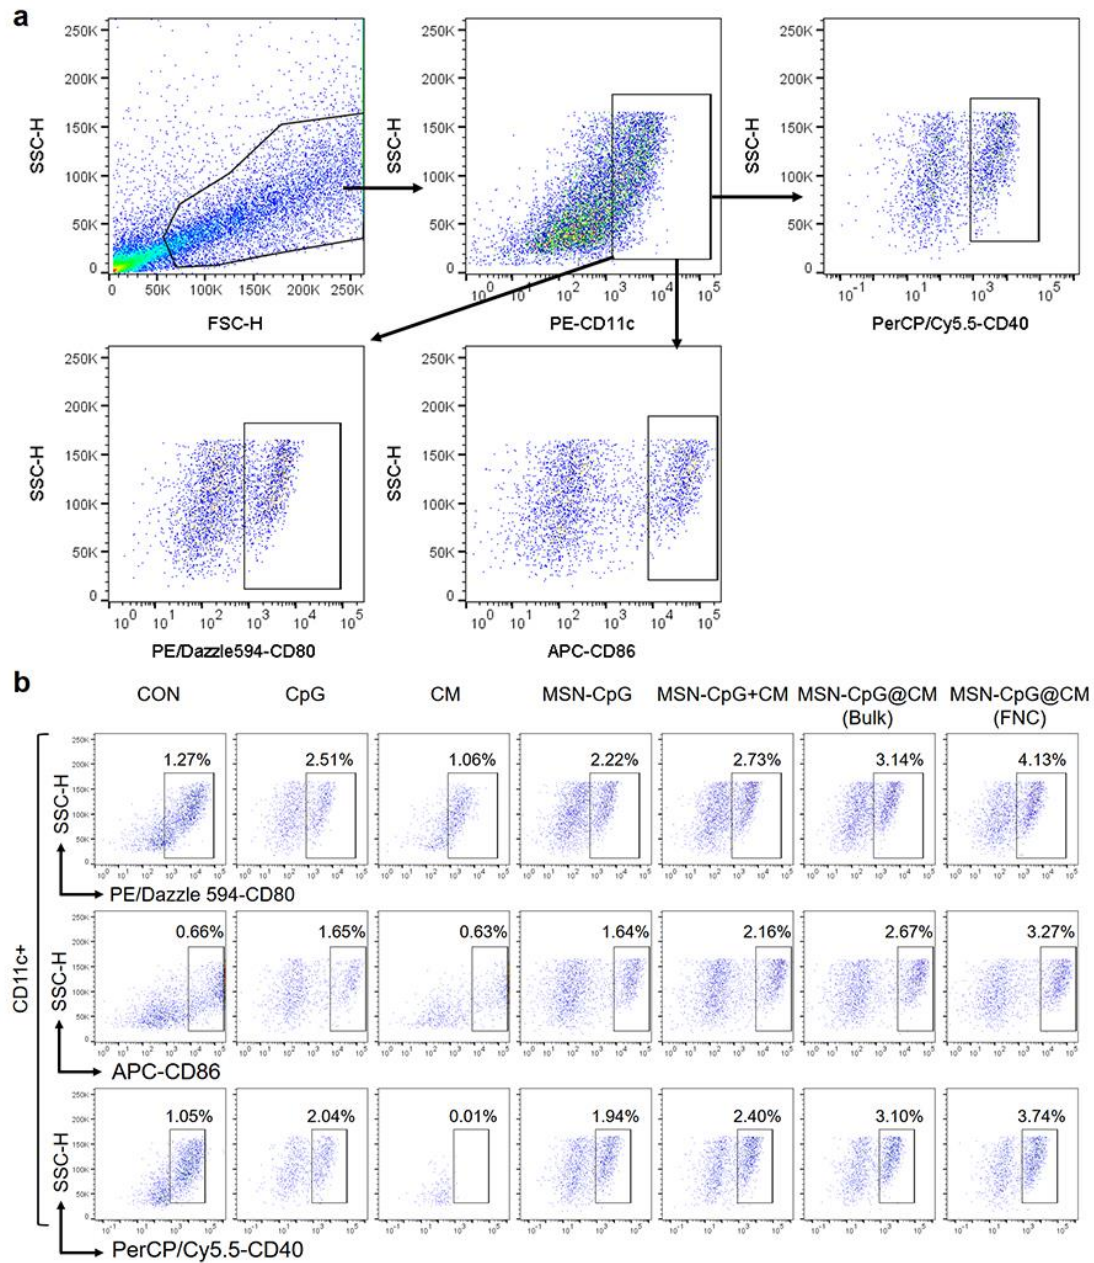

**Figure S7. Quantification of CD40, CD80 and CD86 expression, which are markers for DC maturation on the surface of DCs (CD11c+) after in vitro incubation with nanovaccines for 24 h by Flow cytometry. a) Representative BMDCs gating strategy. b) Flow cytometry analysis of portion of CD40, CD80 and CD86 expressed in BMDCs treated with different nanovaccines and materials in vitro.**

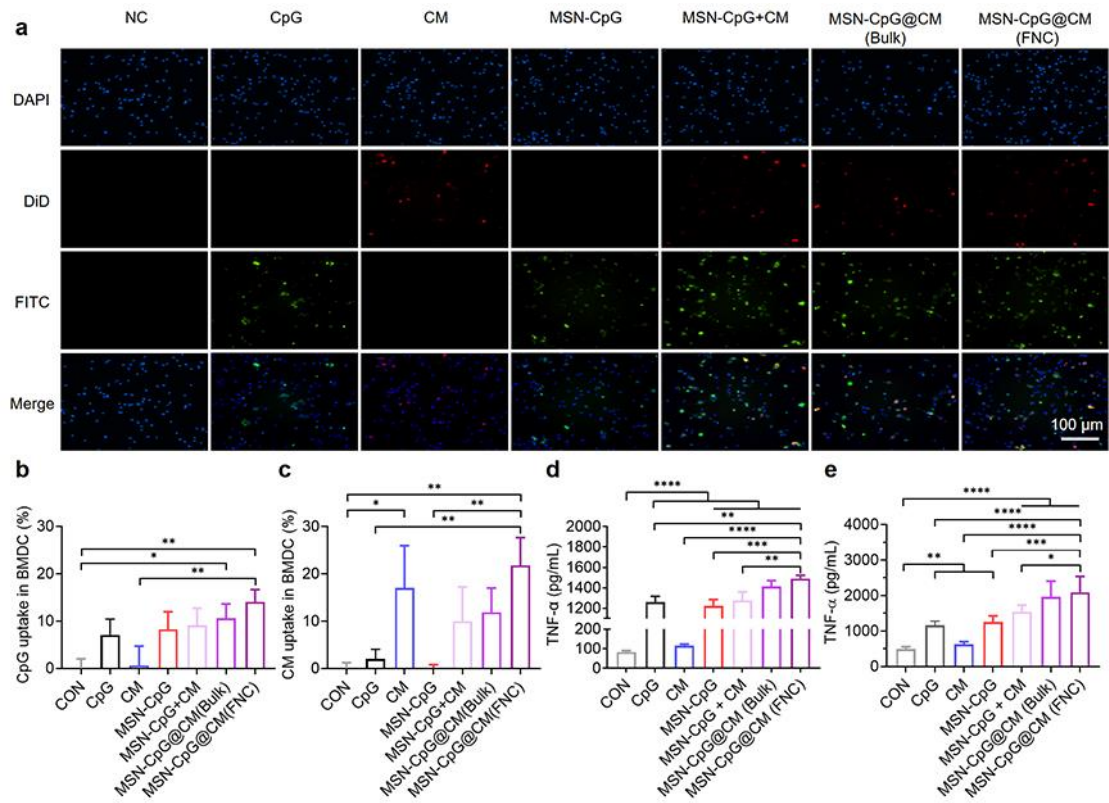

**Figure S8. Uptake of nanovaccines in APCs.** a) Intracellular colocalization of FITC-labeled CpG loaded and DiD-labeled cell membrane-coated nanoparticles by BMDCs. Quantification of fluorescence intensity of b) FITC or c) DiD in Figure 1c. TNF- $\alpha$  secretion of d) BMDC and e) RAW264.7 cells treated with nanovaccines (5  $\mu$ g/mL CpG) were assayed via ELISA. Data are means  $\pm$  SEM (n=3 independent experiments; \*P<0.05, \*\*P<0.01, \*\*\*P<0.001, \*\*\*\*P<0.0001 by one-way ANOVA with Tukey's multiple comparison test). Scale bar, 100  $\mu$ m.

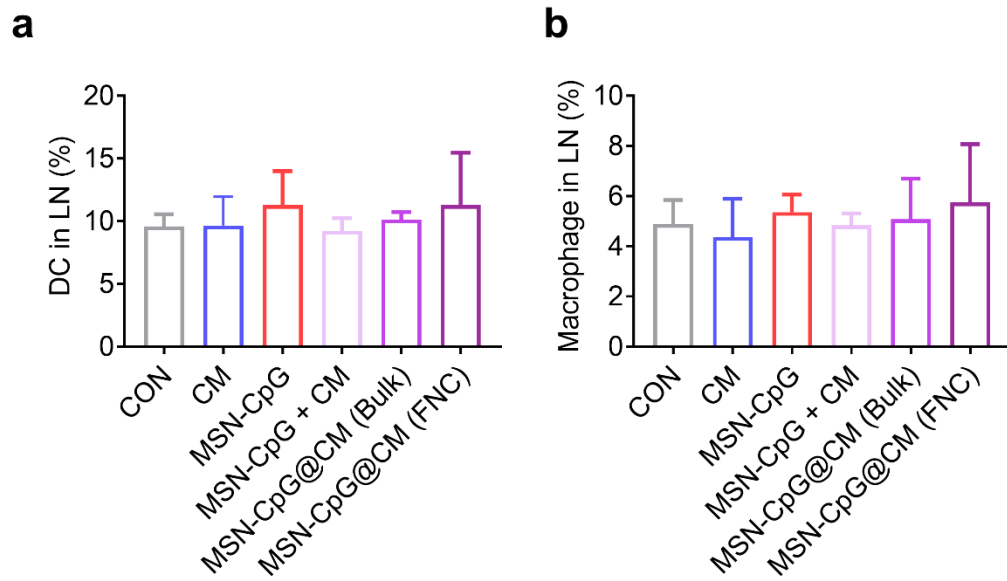

**Figure S9. APCs in the inguinal lymph node at 24 h after foot injection of nanovaccines.** a) DCs and b) macrophages quantified as a percentage of total cells in the inguinal lymph node. Data are means  $\pm$  SEM (n=3).

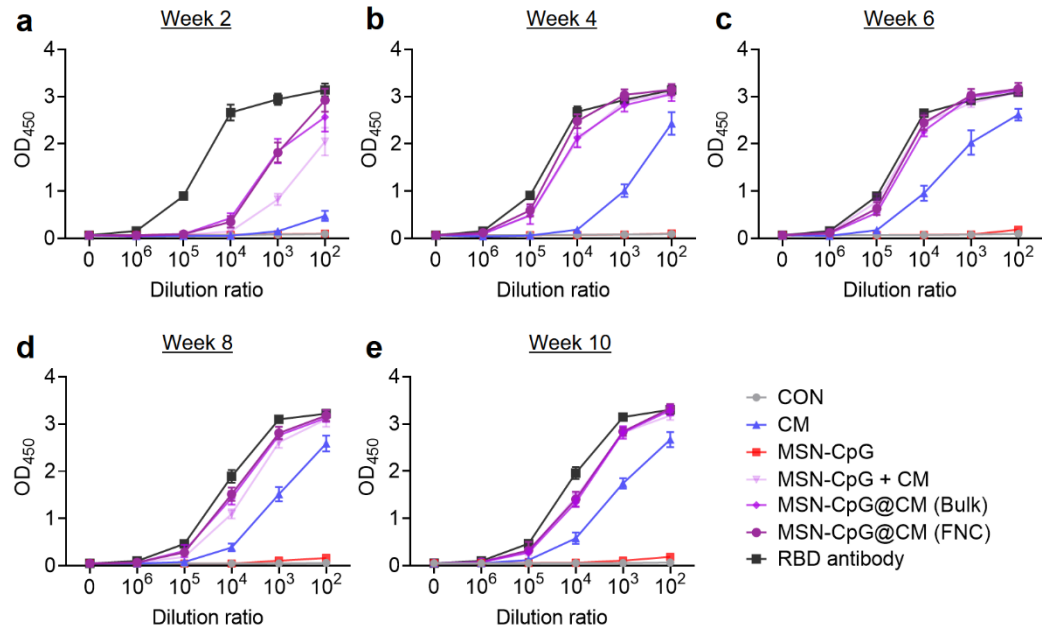

1  
2 **Figure S10. ELISA absorbance vs. dilution curves.** Absorbance vs. dilution for RBD-  
3 specific ELISAs on a) week 2, b) week 4, c) week 6, d) week 8, e) week 10. Data are  
4 means  $\pm$  SEM (n=5 mice per group).

5

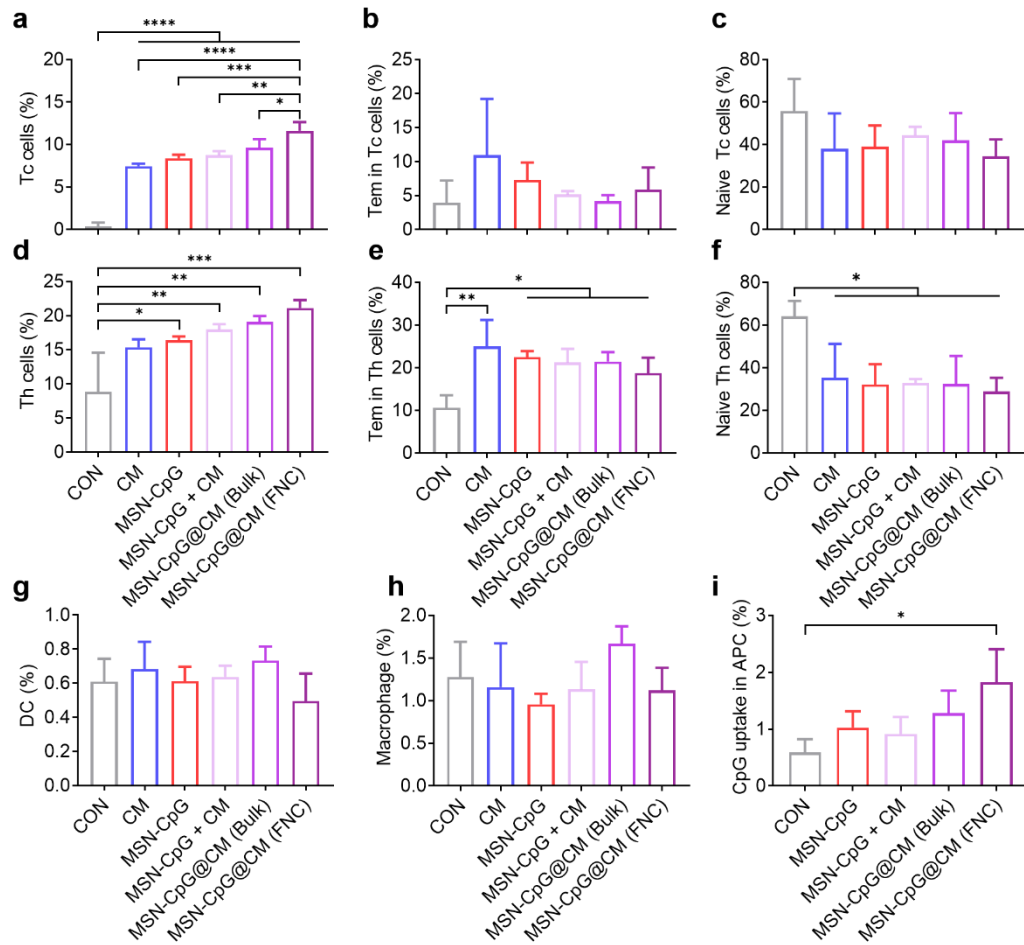

**Figure S11. Enhancement of the T-cell response by nanovaccines in vivo.** a)

Cytotoxic T cells (CD3+ CD8a+ CD4-), d) CD4+ helper T cells (CD3+ CD4+ CD8a-)  
in the spleen of vaccinated mice of week 4. b) and e) Effective Memory T cells (CD44+

CD62L-), c) and f) Naïve T cells (CD44- CD62L+) of vaccinated mice quantified as a

percent of Tc and Th cells, respectively. g) DCs and h) macrophages of immunized

mice quantified as a percentage of spleen immune cells. Uptake of FITC-labeled CpG

loaded nanoparticles of different formulations by i) APCs in the inguinal lymph node

at 24 h after injection. Data are means  $\pm$  SEM (n=3 independent experiments; \*P<0.05,

\*\*P<0.01, \*\*\*P<0.001, \*\*\*\*P<0.0001 by one-way ANOVA with Tukey's multiple

comparison test).

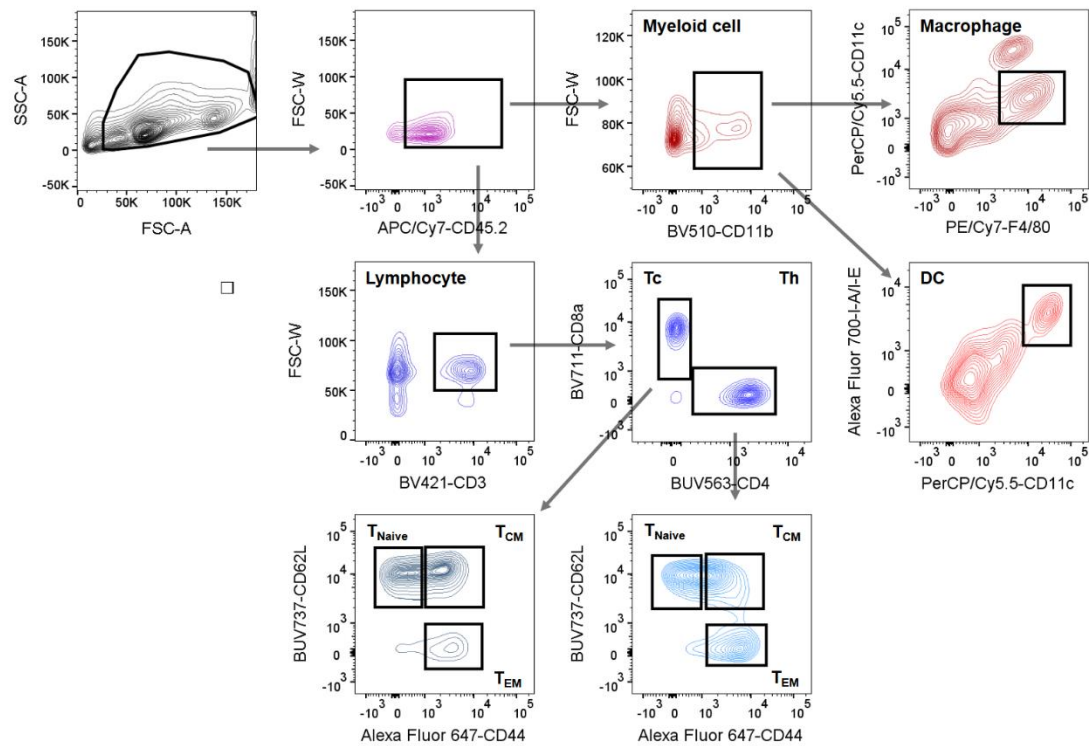

1

2 **Figure S12. Representative T lymphocytes and APCs gating strategy.**

3

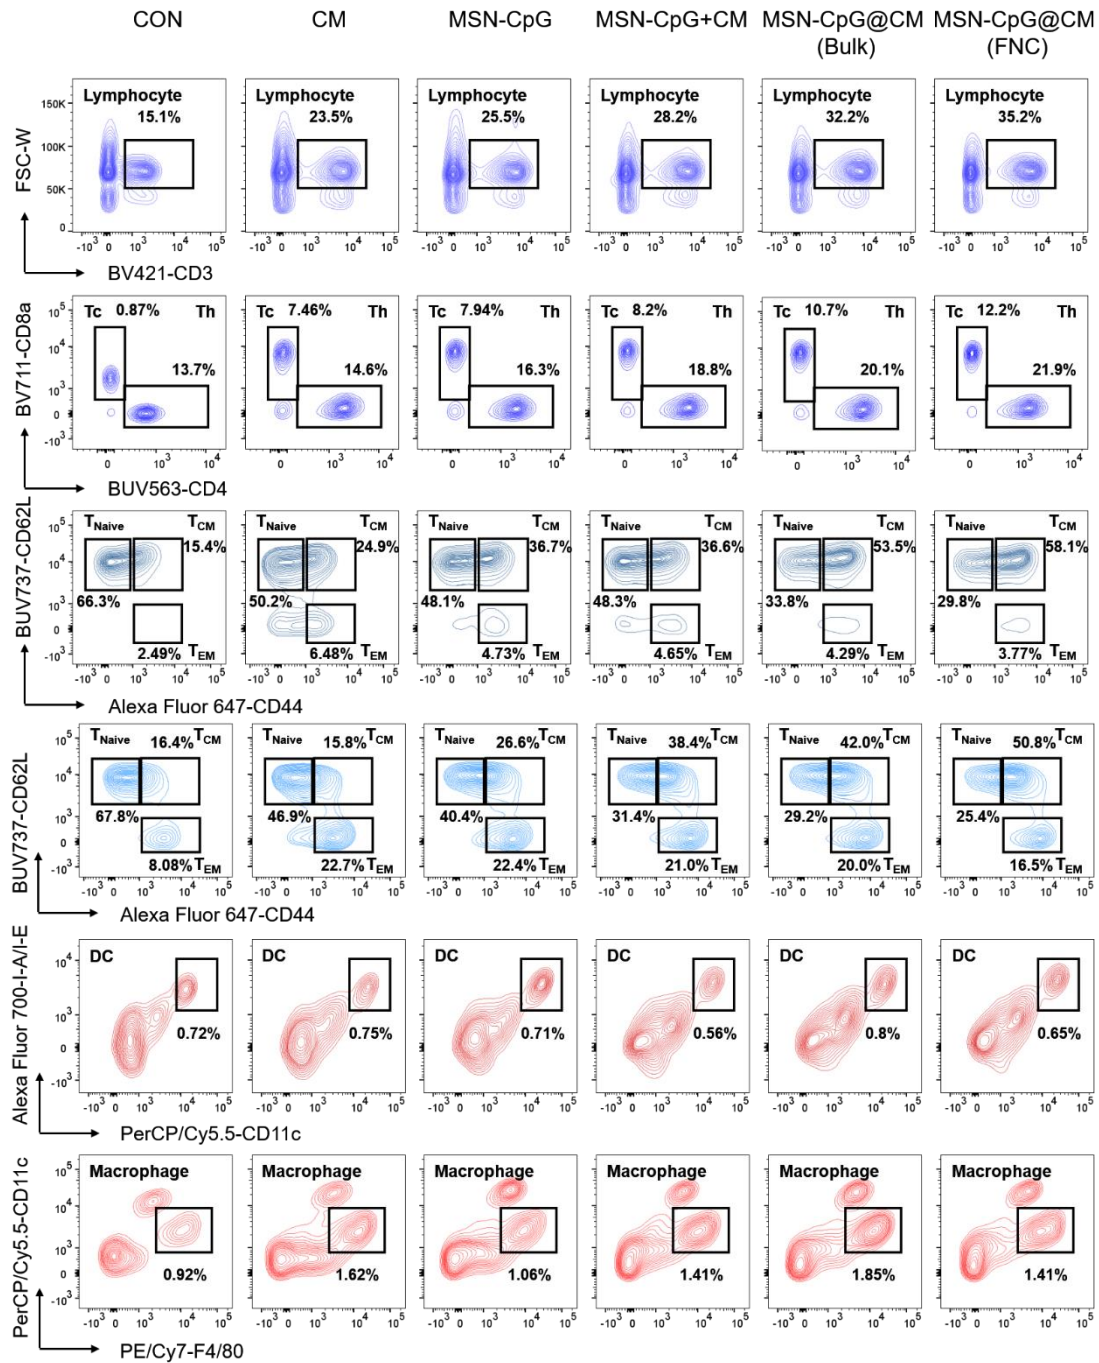

1

2 **Figure S13. Flow cytometry analysis of portion of APCs, T lymphocytes and their**  
 3 **subtypes of vaccinated mice treated with different nanovaccines in vivo.**

4

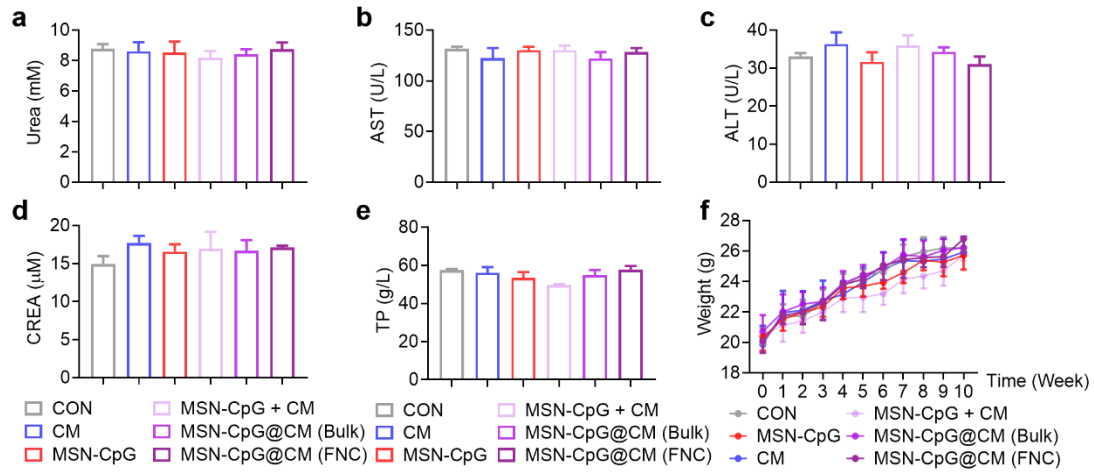

**Figure S14. Biological safety of nanovaccines in vivo.** a) Urea, b) AST, c) ALT, d) CREA, and e) TP were measured in serum on week 10. Data represent mean  $\pm$  SEM (n=3). f) Body weight was monitored until 10 weeks after the prime vaccination. Data represent mean  $\pm$  SEM (n=5).

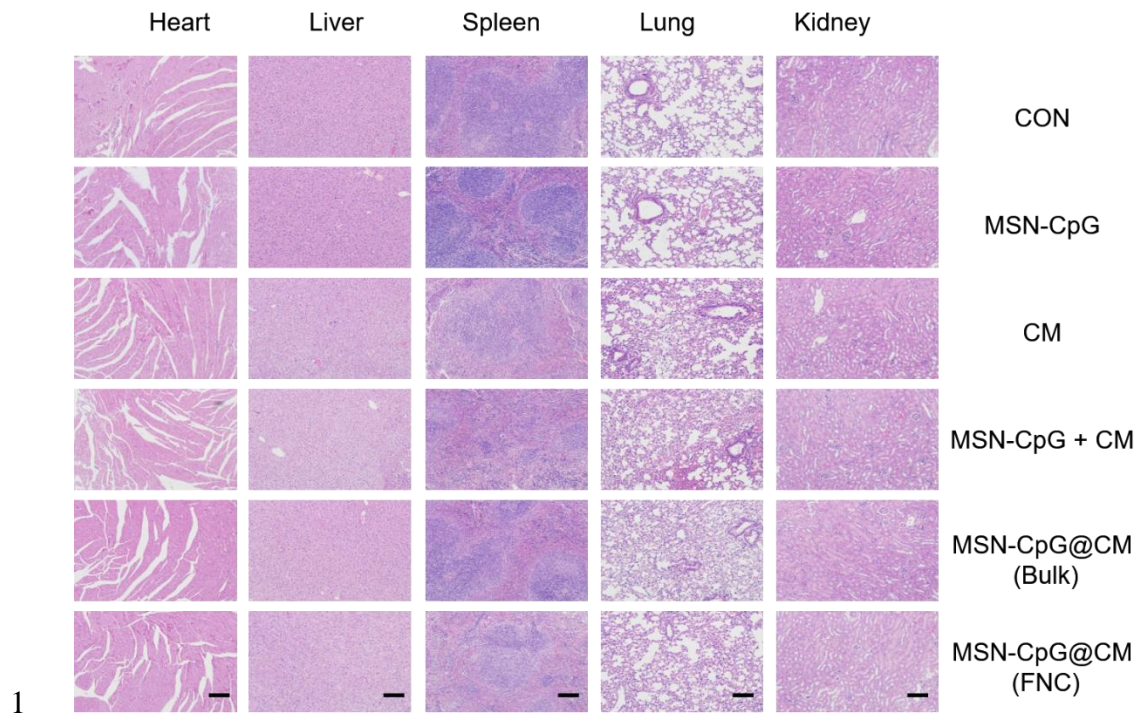

2 **Figure S15. Histological safety of nanovaccines.** Histological images from the major  
3 organ slices of mice administrated with nanoparticles of different formulations. Scale  
4 bar, 100  $\mu$ m.

**Table S1. Comparison of our work with others typical reports.**<sup>1-5</sup>

|   | <b>Ligation method</b>    | <b>Antibody titer (log10)</b> | <b>Detection time</b> | <b>Antigen dosage/per mouse per injection</b> | <b>Injection times</b> | <b>References</b> |
|---|---------------------------|-------------------------------|-----------------------|-----------------------------------------------|------------------------|-------------------|
| 1 | GPI anchor                | 4-5                           | 2-10 weeks            | 0.5 µg RBD                                    | 2                      | Our Nanovaccine   |
| 2 | Charge interaction        | 4-6                           | 2-10 weeks            | 20 µg S1                                      | 3                      | 1                 |
| 3 | Covalently conjugate      | 4-5                           | 2-10 weeks            | 10 µg RBD                                     | 2                      | 2                 |
| 4 | Affinity interaction      | 4                             | 2-4 weeks             | 0.1 µg RBD                                    | 2                      | 3                 |
| 5 | Electrostatic interaction | 3-4                           | 8 weeks               | 10 µg RBD                                     | 2, 3                   | 4                 |
| 6 | Chemical coupling         | 3-4                           | 4 weeks               | 10 µg RBD                                     | 2                      | 5                 |

***Table S2. Antibodies used for Flow Cytometer experiments of immune cells in the spleen of vaccinated mice.***

| <b>Specificity</b> | <b>Fluorochrome</b> | <b>Cat #</b> | <b>Source</b> |
|--------------------|---------------------|--------------|---------------|
| Alexa Fluor 647    | CD44                | 103018       | Biolegend     |
| APC/Cy7            | CD45.2              | 109824       | Biolegend     |
| Alexa Fluor 700    | I-A/I-E             | 107622       | Biolegend     |
| BV421              | CD3                 | 100228       | Biolegend     |
| BV711              | CD8a                | 100748       | Biolegend     |
| PerCP/Cy5.5        | CD11c               | 117328       | Biolegend     |
| V500               | CD11b               | 562127       | BD            |
| BV563              | CD4                 | 612923       | BD            |
| BV737              | CD62L               | 612833       | BD            |
| PE/Cy7             | F4/80               | 123114       | Biolegend     |

**Table S3. Antibodies used for Flow Cytometry experiments of uptake by APCs in the lymph nodes.**

| Specificity     | Fluorochrome | Cat #  | Source    |
|-----------------|--------------|--------|-----------|
| APC/Cy7         | CD45.2       | 109824 | Biolegend |
| PE              | CD11c        | 117318 | Biolegend |
| Alexa Fluor 700 | I-A/I-E      | 107622 | Biolegend |
| PerCP/Cy5.5     | Ly-6c        | 128012 | Biolegend |

### III. References

- 1 Liu, L. *et al.* Subunit Nanovaccine with Potent Cellular and Mucosal Immunity for  
2 COVID-19. *ACS Applied Bio Materials* **3**, 5633-5638 (2020).
- 3
- 4 Ma, X. *et al.* Nanoparticle Vaccines Based on the Receptor Binding Domain (RBD) and  
5 Heptad Repeat (HR) of SARS-CoV-2 Elicit Robust Protective Immune Responses.  
6 *Immunity* **53**, 1315-1330.e1319 (2020).
- 7
- 8 Huang, W. C. *et al.* SARS-CoV-2 RBD Neutralizing Antibody Induction is Enhanced by  
9 Particulate Vaccination. *Adv Mater* **32**, e2005637 (2020).
- 10
- 11 Wang, Y. *et al.* Engineering a self-navigated MnARK nanovaccine for inducing potent  
12 protective immunity against novel coronavirus. *Nano Today* **38**, 101139 (2021).
- 13
- 14 Volpatti, L. R. *et al.* Polymersomes Decorated with the SARS-CoV-2 Spike Protein  
15 Receptor-Binding Domain Elicit Robust Humoral and Cellular Immunity. *ACS Cent Sci* **7**,  
16 1368-1380 (2021).
